# Supplementary material for: Engineered Recombinant Hagfish Intermediate Filament Proteins: Unraveling Domain Roles in Synthetic Fiber Formation and Mechanics
Source: PubMed Central journal article supplement — ACS Omega. 2024 Nov 14;9(47):47023–30. doi: 10.1021/acsomega.4c06950 (PMC11603270; doi:10.1021/acsomega.4c06950), 2024-11-14
Supplement: ao4c06950_si_001.pdf [file ao4c06950_si_001.pdf]

## Supporting Information

Engineered Recombinant Hagfish Intermediate Filament Proteins: Unraveling Domain Roles in Synthetic Fiber Formation and Mechanics

Oran Wasserman<sup>1‡</sup>, Paula E. Oliveira<sup>1‡</sup>, Brianne E. Bell<sup>1</sup>, Samuel Jefferson<sup>1</sup>, Spencer Fairbanks<sup>1</sup>, Annie Watson<sup>1</sup>, Randolph V. Lewis<sup>1</sup>, Justin A. Jones<sup>1\*</sup>

<sup>1</sup>Department of Biology, Utah State University, Logan, UT 84322, USA.

<sup>‡</sup>Authors contributed equally

\*Corresponding Author: Justin A. Jones. E-mail [justin.a.jones@usu.edu](mailto:justin.a.jones@usu.edu); Tel. +1-435-797-9292.

8 Pages

1 Figure

Figure S1. Mechanical and structural results

5 Tables

Table S1. AA sequences

Table S2. Bioreactor results

Table S3. rHIF $\alpha$  mechanical data

Table S4. 1:1  $\alpha$ :  $\gamma$  mechanical data

Table S5. rHIF $\gamma$  mechanical data

## AA Sequences

The amino acid sequences used in making the various protein constructs presented in this study appear in Table S1.

**Table S1.** Amino acid (AA) sequence of the various recombinant hagfish intermediate filaments (rHIF). The rHIF $\alpha$  and the rHIF $\gamma$ (C387S) correspond to  $\alpha$  and  $\gamma$ , respectively.

| Construct                      | AA sequence                                                                                                                                                                                                                                                                                                                                                                                                                                                                                                                                                                   |
|--------------------------------|-------------------------------------------------------------------------------------------------------------------------------------------------------------------------------------------------------------------------------------------------------------------------------------------------------------------------------------------------------------------------------------------------------------------------------------------------------------------------------------------------------------------------------------------------------------------------------|
| <b>N-<math>\alpha</math></b>   | MGHHHHHHHHHSSGHIDDDDKHMLPRMSISQTVSKSYTKSVSRGGQGVSYSQSSSHKVGGSV<br>RYGTTYSSGGISRVLGFQGGAGGAASAGFGGSVGGSLSRVLGGSMVSGYRSGMGVGGLSLSGTAG<br>LPVSLRGGVAGKALHAITSAFRTRVGGPGTSSVGGYGVNYSFLPSTAGPSFGGPFGGPFGGPLGP<br>GYIDPATLSPDVTQHTRIREKQDLQTLNFKFANLVDQVRTLEQHNAILKAQISMITSPSDTPEGVNT<br>AVVASTVTATYNAQIEDLRTTNTALHSEIDHLTTIINDITTKYEEQVEVTRTLETDWNTNKNIDNTYTLI<br>VDLQTKVQGLDEQINTTKQIYNARVREVQAAVTGGPTAAYSIRVDNTHQAIDLTTSLQEMKTHYEVLA<br>TKSREEAFTQVQPRIQEMAVTVQAGPQAIQAKEQIHVFKLQIDSVHREIDRLHRKNTDVEREITVIET<br>NIHTQSDEWTNNINSLKVDLEVIKKQITQYARDYQDLLATKMSLDVEIAAYKKLLDSEETRITS |
| <b>CRD-<math>\alpha</math></b> | MGHHHHHHHHHSSGHIDDDDKHMLPRKQDLQTLNFKFANLVDQVRTLEQHNAILKAQISMITSP<br>SDTPEGVNTAVVASTVTATYNAQIEDLRTTNTALHSEIDHLTTIINDITTKYEEQVEVTRTLETDWNTN<br>KNIDNTYTLTIVDLQTKVQGLDEQINTTKQIYNARVREVQAAVTGGPTAAYSIRVDNTHQAIDLTTSLQ<br>EMKTHYEVLATKSREEAFTQVQPRIQEMAVTVQAGPQAIQAKEQIHVFKLQIDSVHREIDRLHRKNT<br>DVEREITVIETNIHTQSDEWTNNINSLKVDLEVIKKQITQYARDYQDLLATKMSLDVEIAAYKKLLDSEET<br>RITS                                                                                                                                                                                                  |
| <b><math>\alpha</math>-C</b>   | MGHHHHHHHHHSSGHIDDDDKHMLPRKQDLQTLNFKFANLVDQVRTLEQHNAILKAQISMITSP<br>SDTPEGVNTAVVASTVTATYNAQIEDLRTTNTALHSEIDHLTTIINDITTKYEEQVEVTRTLETDWNTN<br>KNIDNTYTLTIVDLQTKVQGLDEQINTTKQIYNARVREVQAAVTGGPTAAYSIRVDNTHQAIDLTTSLQ<br>EMKTHYEVLATKSREEAFTQVQPRIQEMAVTVQAGPQAIQAKEQIHVFKLQIDSVHREIDRLHRKNT<br>DVEREITVIETNIHTQSDEWTNNINSLKVDLEVIKKQITQYARDYQDLLATKMSLDVEIAAYKKLLDSEET<br>RISHGGGITITNAGTFPGGLSAAPGGGASYAMVPAGVGGVGLAGVGGYGFRRSMGGGGGGVGYGA<br>GGGGVGYGVGGGFGGGMGMSMSRMSMGAAVGGGSYGSYSGYSGGFLSSSRAGYSARSKSYSS<br>ARSSRIYTS                                                      |
| <b>N-<math>\gamma</math></b>   | MGHHHHHHHHHSSGHIDDDDKHMHNLNRFEMASHSSVSYRSVRTGGTSAMIGSSGYGGSSSR<br>AMGLGMGAAGLSMGGGFRVGSAGIGGMGISSGIGGMGISSRAGGMSAYGGAASGGAGGFVSG<br>GVPMLGYGGGAGGFIGGVSPGIMASPAFTAGRAITSAGMSGVVGTLGPAGGMVPSLVSRLVSRDEVKNIL<br>GTLNQLRASYVDKVRQLTIENTMEEELKNLTGGVPMSPDSTVNLENVETQVTEMLTEVSNLTLERVR<br>LEIDVDHLRATADEIKSKYEFELGVRMQLETDIANMKRDLEAANDMRVDLDSKFNFLTEELTFQRKTQ<br>MEELNTLKQQFGRGLPVQTSVIELDNVKSVDALNVMREEYQQVVTKNVQEAETYSKMQIDQIQ<br>GISTQTTEQISILDKEINTLEKELQPLNVEYQRLTTYQTLGDRITDLQNRRESIDLQVFQNTYTRYEQEIEG<br>NQVDLQRQLVTYQQLLDVKLTALDAEIATYKKLLEGQELMVT                        |
| <b>CRD-<math>\gamma</math></b> | MGHHHHHHHHHSSGHIDDDDKHMHNLNRFKNI LGTLNQLRASYVDKVRQLTIENTMEEELKN<br>LTGGVPMSPDSTVNLENVETQVTEMLTEVSNLTLERVRLEIDVDHLRATADEIKSKYEFELGVRMQLET<br>DIANMKRDLEAANDMRVDLDSKFNFLTEELTFQRKTQMEELNTLKQQFGRGLPVQTSVIELDNVKS<br>VNLTDALNVMREEYQQVVTKNVQEAETYSKMQIDQIQGISTQTTEQISILDKEINTLEKELQPLNVEYQR                                                                                                                                                                                                                                                                                      |

LLTTYQTLGDRLTDLQNRRESIDLQVFQNTYTRYEQEIEGNQVDLQRQLVITYQQLLDVKTALDAEIATYKK  
LLEGQELMVT

**γ-C** MGHHHHHHHHHSSGHIDDDDKHMHNLNRFKNI<sub>L</sub>GLNQLASVVDKVRQLTIENETMEEELKN  
LTGGVPMSPDSTVNLENVETQVTEMLTEVSNLTLERVLEIDVDHLRATADEIKSKYEFELGVRMQLET  
DIANMKRDLEAANDMRVDLDSKFNFLTEELTFQRKTQMEELN<sub>L</sub>KQQFGRLGPVQTSVIELDNVKS  
NLTDALNVMREEYQQVVTKNVQEAETYSKM<sub>Q</sub>IDQIQGISTQTTEQISILDKEINTLEKELQPLNVEYQR  
LLTTYQTLGDRLTDLQNRRESIDLQVFQNTYTRYEQEIEGNQVDLQRQLVITYQQLLDVKTALDAEIATYKK  
LLEGQELMVRTAMADDFAHATVVRSGTLGGASSSSVGYGASSTLGAISGGYSTGGGASYSAGAGGA  
SYSAGAGGASYGVGGGYSGSSAMMEGSSSGHSMYSSSSMKRSSSKSASASAGGYGTSGHDSTIIL  
QQTS

### Bioreactor results

Results for each of the bioreactor runs (Table S2) performed for this study (N-α, CRD-α, α-C, N-γ, CRD-γ, and γ-C).

**Table S2.** The bioreactor runs OD<sub>600</sub> values, cell mass, and reactor size.

| Protein Construct | OD <sub>600</sub> at induction | Final OD <sub>600</sub> | Wet cell mass (g) | Bioreactor size (L) |
|-------------------|--------------------------------|-------------------------|-------------------|---------------------|
| N-α               | 86                             | 138                     | 338               | 2                   |
| CRD-α             | 84                             | 128                     | 276               | 2                   |
| α-C               | 69                             | 96                      | 224               | 2                   |
| N-γ               | 38                             | 81                      | 132               | 10                  |
| CRD-γ             | 46                             | 74                      | 172               | 2                   |
| γ-C               | 58                             | 113                     | 221               | 2                   |

### Mechanical results

The primary mechanical and structural results presented in the main paper were converted to graphical form in Figure S1. These figures help visualize the differences in properties for the different constructs.

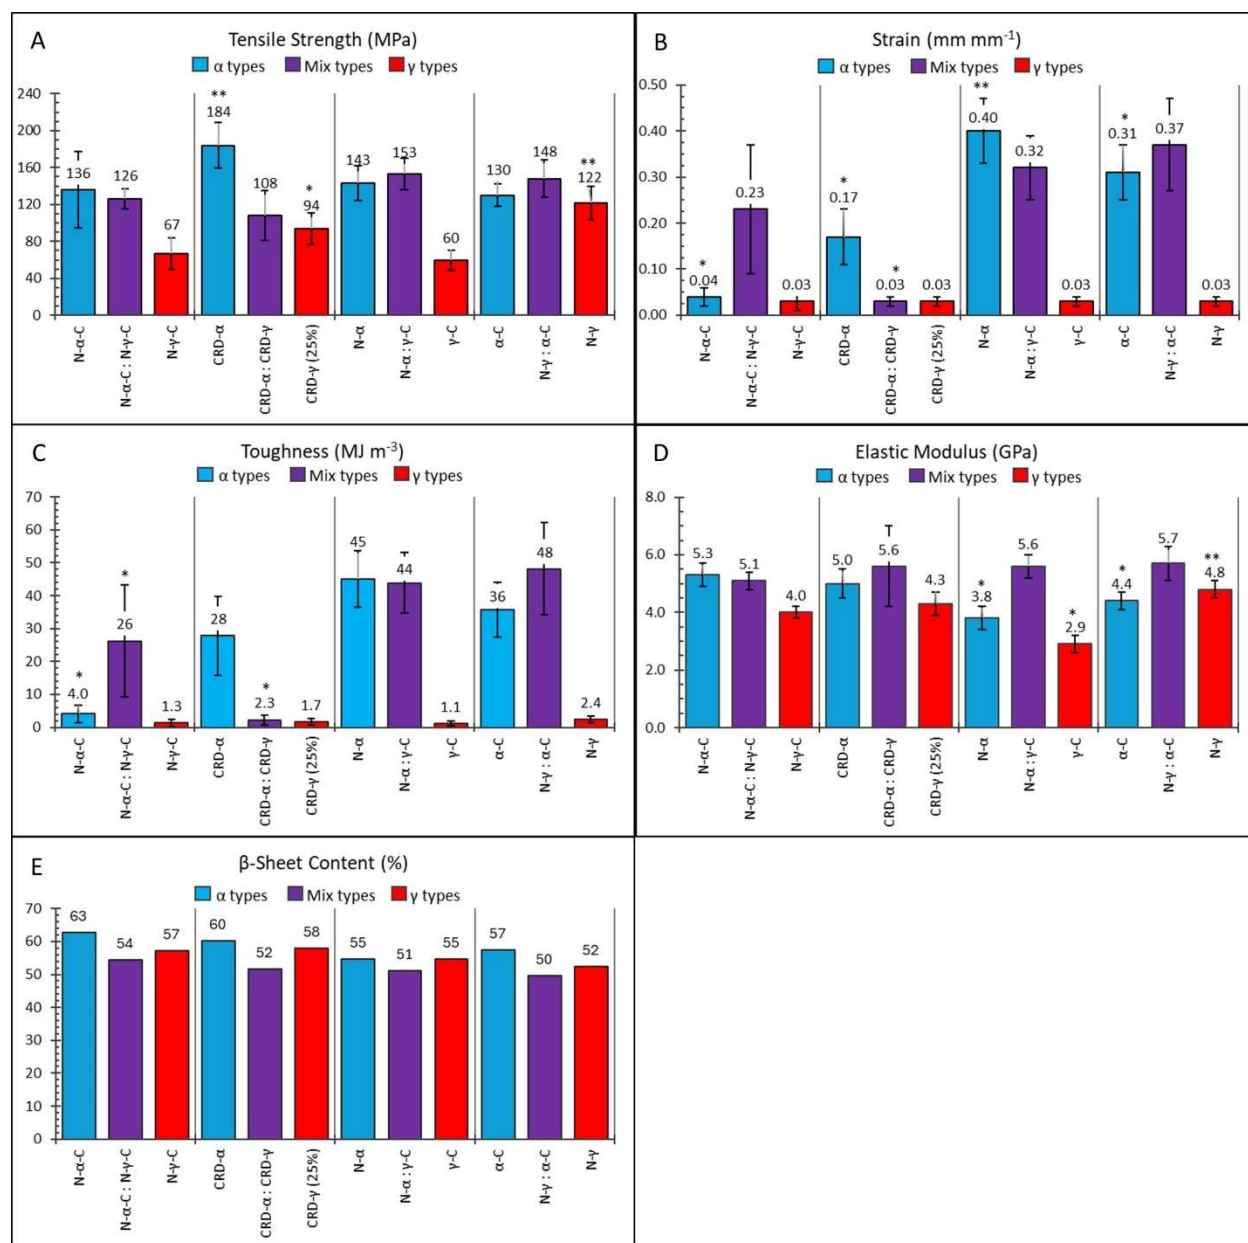

**Figure S1.** Mechanical and structural properties of the different constructs spun from 20% w/v dopes (CRD-γ at 25%) into SW with a 2X2X stretch factor application. A. Tensile strength, B. Strain, C. Toughness, D. Elastic modulus, E. β-sheet content. Panels A-D are averages with standard deviation error bars. \* Indicates a significantly worse property for that protein group, while \*\* indicates a significantly better property for that protein group.

The mechanical properties of the different protein constructs at various protein concentrations, stretch factors, and bath contents appear in separate tables corresponding to the protein type

for each table. These tables only include constructs, concentrations, stretch factors, and bath contents for successfully formed fibers. Table S3 focuses on the rHIF $\alpha$  constructs that need the C-terminus for fiber formation in dH<sub>2</sub>O. In the table, rHIF $\alpha$  is reduced to N- $\alpha$ -C to indicate the full-length construct that includes both termini.

**Table S3.** Mechanical properties from various concentrations of the rHIF $\alpha$  constructs spun at multiple stretch factors. Here, dH<sub>2</sub>O is deionized water, and SW is salt water from Instant Ocean.

| Construct |                | Water Type        | n  | Toughness (MJ/m <sup>3</sup> ) | Tensile Stress (MPa) | Strain (mm/mm) | Diameter (micron) | Elastic Modulus (GPa) |
|-----------|----------------|-------------------|----|--------------------------------|----------------------|----------------|-------------------|-----------------------|
| 15% w/v   |                |                   |    |                                |                      |                |                   |                       |
| 1X1X      | N- $\alpha$ -C | dH <sub>2</sub> O | 6  | 1.08 ± 0.9                     | 44.8 ± 8.1           | 0.03 ± 0.02    | 50.2 ± 1.0        | 2.1 ± 0.3             |
|           | $\alpha$ -C    | dH <sub>2</sub> O | 6  | 11.3 ± 9.7                     | 66.5 ± 15            | 0.23 ± 0.20    | 36.4 ± 4.4        | 3.1 ± 0.9             |
|           | N- $\alpha$ -C | SW                | 10 | 0.51 ± 0.3                     | 50.5 ± 14            | 0.02 ± 0.01    | 66.3 ± 1.2        | 3.0 ± 0.2             |
|           | N- $\alpha$    | SW                | 8  | 3.70 ± 2.9                     | 50.4 ± 14            | 0.11 ± 0.09    | 56.4 ± 6.2        | 2.9 ± 0.8             |
|           | CRD- $\alpha$  | SW                | 10 | 1.22 ± 0.7                     | 93.0 ± 28            | 0.02 ± 0.01    | 59.7 ± 3.1        | 4.2 ± 0.3             |
|           | $\alpha$ -C    | SW                | 9  | 0.87 ± 0.8                     | 64.3 ± 32            | 0.02 ± 0.01    | 69.7 ± 9.6        | 3.1 ± 0.9             |
| 1.5X1.5X  | N- $\alpha$ -C | dH <sub>2</sub> O | 9  | 24.0 ± 7.0                     | 66.7 ± 7.6           | 0.42 ± 0.14    | 35.0 ± 2.6        | 2.5 ± 0.8             |
|           | N- $\alpha$ -C | SW                | 9  | 0.49 ± 0.2                     | 53.1 ± 12            | 0.02 ± 0.00    | 56.5 ± 4.5        | 3.4 ± 0.3             |
|           | N- $\alpha$    | SW                | 5  | 0.85 ± 0.7                     | 46.5 ± 18            | 0.02 ± 0.01    | 47.4 ± 2.5        | 2.9 ± 0.4             |
|           | CRD- $\alpha$  | SW                | 7  | 3.20 ± 1.1                     | 144 ± 16             | 0.04 ± 0.01    | 42.5 ± 2.7        | 5.1 ± 0.4             |
|           | $\alpha$ -C    | SW                | 10 | 1.13 ± 0.5                     | 87.6 ± 12            | 0.02 ± 0.00    | 42.5 ± 1.5        | 4.6 ± 0.4             |
| 2X2X      | N- $\alpha$ -C | dH <sub>2</sub> O | 9  | 19.3 ± 9.6                     | 60.8 ± 9.5           | 0.38 ± 0.20    | 35.5 ± 3.5        | 2.5 ± 0.8             |
|           | N- $\alpha$ -C | SW                | 10 | 27.7 ± 9.2                     | 98.6 ± 14            | 0.33 ± 0.14    | 34.2 ± 1.9        | 3.6 ± 0.8             |
|           | N- $\alpha$    | SW                | 7  | 15.8 ± 12                      | 79.6 ± 33            | 0.21 ± 0.14    | 34.5 ± 1.9        | 3.5 ± 0.7             |
|           | CRD- $\alpha$  | SW                | 10 | 13.4 ± 4.6                     | 207 ± 26             | 0.08 ± 0.02    | 33.2 ± 2.5        | 6.6 ± 0.8             |
|           | $\alpha$ -C    | SW                | 10 | 10.3 ± 4.2                     | 128 ± 15             | 0.10 ± 0.03    | 34.2 ± 2.1        | 4.5 ± 0.4             |
| 2.5X2.5X  | N- $\alpha$ -C | SW                | 10 | 21.0 ± 9.9                     | 137 ± 23             | 0.18 ± 0.08    | 30.5 ± 1.9        | 4.5 ± 0.9             |
|           | $\alpha$ -C    | SW                | 8  | 2.55 ± 2.0                     | 111 ± 26             | 0.04 ± 0.02    | 31.6 ± 5.1        | 4.5 ± 1.1             |
| 20% w/v   |                |                   |    |                                |                      |                |                   |                       |
| 1X1X      | N- $\alpha$ -C | dH <sub>2</sub> O | 10 | 2.50 ± 1.4                     | 62.3 ± 13            | 0.05 ± 0.02    | 58.3 ± 5.7        | 2.5 ± 0.3             |
|           | $\alpha$ -C    | dH <sub>2</sub> O | 9  | 2.17 ± 1.9                     | 54.9 ± 28            | 0.06 ± 0.04    | 54.5 ± 4.1        | 2.3 ± 0.2             |
|           | N- $\alpha$ -C | SW                | 10 | 0.94 ± 0.3                     | 74.7 ± 12            | 0.03 ± 0.01    | 73.3 ± 3.7        | 3.3 ± 0.5             |
|           | N- $\alpha$    | SW                | 10 | 1.27 ± 0.9                     | 58.5 ± 15            | 0.04 ± 0.03    | 73.9 ± 3.8        | 2.5 ± 0.4             |
| 1.5X1.5X  | N- $\alpha$ -C | dH <sub>2</sub> O | 13 | 18.6 ± 16                      | 74.8 ± 18            | 0.30 ± 0.27    | 45.2 ± 4.7        | 2.7 ± 0.5             |
|           | $\alpha$ -C    | dH <sub>2</sub> O | 10 | 17.7 ± 11                      | 69.6 ± 14            | 0.32 ± 0.17    | 26.2 ± 2.8        | 2.6 ± 0.8             |
|           | N- $\alpha$ -C | SW                | 8  | 1.29 ± 0.6                     | 90.9 ± 20            | 0.03 ± 0.01    | 60.8 ± 9.7        | 3.9 ± 0.5             |
|           | N- $\alpha$    | SW                | 8  | 35.5 ± 17                      | 76.7 ± 9.8           | 0.58 ± 0.25    | 41.1 ± 4.2        | 3.4 ± 0.6             |
|           | CRD- $\alpha$  | SW                | 7  | 3.78 ± 1.9                     | 96.6 ± 8.1           | 0.06 ± 0.02    | 60.8 ± 2.1        | 3.4 ± 0.3             |
|           | $\alpha$ -C    | SW                | 10 | 1.88 ± 0.6                     | 96.5 ± 19            | 0.03 ± 0.01    | 58.0 ± 3.4        | 3.4 ± 0.4             |
| 2X2X      | N- $\alpha$ -C | dH <sub>2</sub> O | 18 | 16.5 ± 12                      | 91.5 ± 25            | 0.19 ± 0.11    | 38.5 ± 4.1        | 3.1 ± 0.4             |
| 2.5X2.5X  | N- $\alpha$ -C | SW                | 9  | 2.31 ± 1.2                     | 147 ± 40             | 0.03 ± 0.01    | 38.5 ± 4.7        | 5.9 ± 0.6             |
|           | N- $\alpha$    | SW                | 10 | 25.6 ± 6.5                     | 200 ± 26             | 0.17 ± 0.03    | 23.1 ± 1.3        | 5.3 ± 0.7             |
|           | CRD- $\alpha$  | SW                | 8  | 40.8 ± 9.4                     | 178 ± 27             | 0.30 ± 0.07    | 37.2 ± 2.2        | 4.5 ± 0.5             |
|           | $\alpha$ -C    | SW                | 10 | 19.4 ± 8.1                     | 188 ± 38             | 0.13 ± 0.04    | 34.5 ± 1.4        | 5.2 ± 0.6             |
| 25% w/v   |                |                   |    |                                |                      |                |                   |                       |
| 1X1X      | N- $\alpha$ -C | dH <sub>2</sub> O | 8  | 3.68 ± 2.8                     | 60.5 ± 12            | 0.08 ± 0.06    | 64.7 ± 5.2        | 2.5 ± 0.7             |
|           | N- $\alpha$    | dH <sub>2</sub> O | 8  | 7.05 ± 3.4                     | 67.6 ± 22            | 0.13 ± 0.06    | 46.1 ± 11         | 2.8 ± 0.8             |
|           | $\alpha$ -C    | dH <sub>2</sub> O | 4  | 0.57 ± 0.6                     | 34.4 ± 18            | 0.03 ± 0.02    | 39.5 ± 6.6        | 2.4 ± 0.8             |
|           | N- $\alpha$ -C | SW                | 10 | 0.71 ± 0.2                     | 55.6 ± 7.6           | 0.03 ± 0.01    | 80.9 ± 1.9        | 2.4 ± 0.2             |
|           | N- $\alpha$    | SW                | 8  | 1.35 ± 0.2                     | 66.6 ± 8.3           | 0.04 ± 0.00    | 81.4 ± 4.4        | 2.3 ± 0.2             |

|          |                |                   |    |                |                |                 |                |               |
|----------|----------------|-------------------|----|----------------|----------------|-----------------|----------------|---------------|
|          | CRD- $\alpha$  | SW                | 9  | 2.35 $\pm$ 1.1 | 98.4 $\pm$ 23  | 0.04 $\pm$ 0.01 | 78.1 $\pm$ 4.5 | 3.0 $\pm$ 0.4 |
|          | $\alpha$ -C    | SW                | 10 | 1.42 $\pm$ 0.5 | 78.5 $\pm$ 14  | 0.03 $\pm$ 0.01 | 78.8 $\pm$ 5.0 | 2.9 $\pm$ 0.4 |
| 1.5X1.5X | N- $\alpha$ -C | dH <sub>2</sub> O | 10 | 27.2 $\pm$ 14  | 61.6 $\pm$ 7.2 | 0.53 $\pm$ 0.27 | 51.9 $\pm$ 5.4 | 2.1 $\pm$ 0.8 |
|          | N- $\alpha$    | dH <sub>2</sub> O | 7  | 3.39 $\pm$ 2.8 | 64.7 $\pm$ 3.1 | 0.07 $\pm$ 0.05 | 56.0 $\pm$ 3.2 | 2.5 $\pm$ 0.1 |
|          | $\alpha$ -C    | dH <sub>2</sub> O | 9  | 21.4 $\pm$ 11  | 68.2 $\pm$ 7.6 | 0.37 $\pm$ 0.18 | 34.3 $\pm$ 0.9 | 2.3 $\pm$ 0.2 |
|          | N- $\alpha$ -C | SW                | 10 | 21.5 $\pm$ 23  | 85.4 $\pm$ 11  | 0.29 $\pm$ 0.29 | 57.0 $\pm$ 5.8 | 3.0 $\pm$ 0.4 |
|          | N- $\alpha$    | SW                | 6  | 2.32 $\pm$ 1.1 | 69.9 $\pm$ 2.3 | 0.05 $\pm$ 0.02 | 69.2 $\pm$ 4.0 | 2.5 $\pm$ 0.2 |
|          | CRD- $\alpha$  | SW                | 8  | 3.46 $\pm$ 1.4 | 113 $\pm$ 19   | 0.05 $\pm$ 0.01 | 66.4 $\pm$ 4.9 | 3.5 $\pm$ 0.3 |
|          | $\alpha$ -C    | SW                | 9  | 34.6 $\pm$ 16  | 94.4 $\pm$ 5.7 | 0.42 $\pm$ 0.18 | 54.9 $\pm$ 2.0 | 2.8 $\pm$ 0.7 |
| 2X2X     | N- $\alpha$ -C | SW                | 10 | 30.0 $\pm$ 8.2 | 152 $\pm$ 10   | 0.23 $\pm$ 0.05 | 40.6 $\pm$ 0.5 | 4.2 $\pm$ 0.2 |
|          | N- $\alpha$    | SW                | 9  | 44.0 $\pm$ 5.2 | 110 $\pm$ 10   | 0.48 $\pm$ 0.09 | 47.5 $\pm$ 2.5 | 3.1 $\pm$ 0.2 |
|          | CRD- $\alpha$  | SW                | 8  | 17.0 $\pm$ 11  | 212 $\pm$ 37   | 0.11 $\pm$ 0.05 | 40.8 $\pm$ 3.2 | 5.3 $\pm$ 0.8 |
|          | $\alpha$ -C    | SW                | 9  | 27.3 $\pm$ 5.2 | 117 $\pm$ 11   | 0.26 $\pm$ 0.05 | 47.6 $\pm$ 1.1 | 3.5 $\pm$ 0.6 |
| 2.5X2.5X | N- $\alpha$ -C | SW                | 9  | 19.6 $\pm$ 5.3 | 139 $\pm$ 10   | 0.17 $\pm$ 0.04 | 40.7 $\pm$ 0.6 | 4.7 $\pm$ 1.1 |
|          | N- $\alpha$    | SW                | 10 | 28.0 $\pm$ 5.1 | 198 $\pm$ 11   | 0.18 $\pm$ 0.03 | 38.4 $\pm$ 0.7 | 4.5 $\pm$ 0.2 |
|          | CRD- $\alpha$  | SW                | 8  | 28.9 $\pm$ 20  | 189 $\pm$ 29   | 0.18 $\pm$ 0.10 | 41.5 $\pm$ 2.0 | 4.6 $\pm$ 0.4 |
|          | $\alpha$ -C    | SW                | 10 | 32.2 $\pm$ 11  | 118 $\pm$ 45   | 0.35 $\pm$ 0.11 | 44.4 $\pm$ 7.5 | 3.1 $\pm$ 1.5 |

Mechanical data of the fibers from combining the rHIF $\alpha$  and rHIF $\gamma$ (C387S) constructs in a 1:1 ratio (Table S4). In this table, the rHIF $\alpha$  and rHIF $\gamma$ (C387S) full-length proteins are indicated by  $\alpha$  and  $\gamma$ , respectively.

**Table S4.** Mechanical properties from various concentrations of the 1:1 rHIF $\alpha$ : rHIF $\gamma$ (C387S) constructs spun at multiple stretch factors. Here, dH<sub>2</sub>O is deionized water, and SW is salt water from Instant Ocean.

|          | Constructs                    | Water Type        | n  | Toughness (MJ/m <sup>3</sup> ) | Tensile Stress (MPa) | Strain (mm/mm)  | Diameter (micron) | Elastic Modulus (GPa) |
|----------|-------------------------------|-------------------|----|--------------------------------|----------------------|-----------------|-------------------|-----------------------|
| 15% w/v  |                               |                   |    |                                |                      |                 |                   |                       |
| 1X1X     | $\alpha$ : $\gamma$           | dH <sub>2</sub> O | 11 | 2.48 $\pm$ 1.5                 | 58.6 $\pm$ 8.1       | 0.05 $\pm$ 0.03 | 52.9 $\pm$ 0.6    | 2.4 $\pm$ 0.1         |
| 1.5X1.5X | $\alpha$ : $\gamma$           | dH <sub>2</sub> O | 15 | 27.7 $\pm$ 14                  | 64.1 $\pm$ 6.2       | 0.52 $\pm$ 0.29 | 41.6 $\pm$ 3.1    | 2.5 $\pm$ 0.2         |
|          | $\alpha$ : $\gamma$           | SW                | 7  | 0.34 $\pm$ 0.2                 | 40.4 $\pm$ 11        | 0.01 $\pm$ 0.00 | 50.3 $\pm$ 0.4    | 3.0 $\pm$ 0.1         |
| 2X2X     | $\alpha$ : $\gamma$           | dH <sub>2</sub> O | 20 | 28.9 $\pm$ 9.3                 | 91.8 $\pm$ 15        | 0.38 $\pm$ 0.14 | 30.5 $\pm$ 2.1    | 2.9 $\pm$ 0.5         |
|          | $\alpha$ : $\gamma$           | SW                | 7  | 22.1 $\pm$ 12                  | 56.5 $\pm$ 18        | 0.50 $\pm$ 0.13 | 36.6 $\pm$ 0.4    | 3.1 $\pm$ 0.5         |
| 20% w/v  |                               |                   |    |                                |                      |                 |                   |                       |
| 1X1X     | $\alpha$ : $\gamma$           | dH <sub>2</sub> O | 8  | 2.24 $\pm$ 1.4                 | 49.8 $\pm$ 11        | 0.06 $\pm$ 0.02 | 70.3 $\pm$ 5.5    | 2.1 $\pm$ 0.5         |
|          | N- $\alpha$ : $\gamma$ -C     | dH <sub>2</sub> O | 9  | 1.97 $\pm$ 1.3                 | 62.8 $\pm$ 18        | 0.04 $\pm$ 0.02 | 57.7 $\pm$ 3.7    | 3.2 $\pm$ 0.5         |
|          | N- $\gamma$ : $\alpha$ -C     | dH <sub>2</sub> O | 8  | 5.11 $\pm$ 4.4                 | 59.6 $\pm$ 7.6       | 0.11 $\pm$ 0.08 | 52.2 $\pm$ 2.2    | 2.9 $\pm$ 0.2         |
|          | $\alpha$ : $\gamma$           | SW                | 8  | 1.38 $\pm$ 1.1                 | 84.0 $\pm$ 21        | 0.02 $\pm$ 0.01 | 66.9 $\pm$ 7.8    | 4.8 $\pm$ 0.3         |
|          | CRD- $\alpha$ : CRD- $\gamma$ | SW                | 8  | 0.65 $\pm$ 0.4                 | 70.1 $\pm$ 19        | 0.02 $\pm$ 0.01 | 66.5 $\pm$ 2.2    | 5.5 $\pm$ 0.9         |
|          | N- $\alpha$ : $\gamma$ -C     | SW                | 8  | 0.82 $\pm$ 0.6                 | 79.3 $\pm$ 30        | 0.02 $\pm$ 0.01 | 65.3 $\pm$ 4.9    | 5.4 $\pm$ 0.3         |
|          | N- $\gamma$ : $\alpha$ -C     | SW                | 8  | 0.36 $\pm$ 0.2                 | 53.0 $\pm$ 20        | 0.01 $\pm$ 0.00 | 65.1 $\pm$ 4.0    | 5.0 $\pm$ 0.2         |
| 1.5X1.5X | $\alpha$ : $\gamma$           | dH <sub>2</sub> O | 12 | 37.6 $\pm$ 4.8                 | 68.5 $\pm$ 8.2       | 0.63 $\pm$ 0.07 | 45.5 $\pm$ 2.2    | 2.2 $\pm$ 0.2         |
|          | N- $\alpha$ : $\gamma$ -C     | dH <sub>2</sub> O | 7  | 1.74 $\pm$ 1.5                 | 64.6 $\pm$ 8.9       | 0.04 $\pm$ 0.03 | 50.3 $\pm$ 3.0    | 3.0 $\pm$ 0.4         |
|          | N- $\gamma$ : $\alpha$ -C     | dH <sub>2</sub> O | 10 | 41.7 $\pm$ 20                  | 74.5 $\pm$ 5.5       | 0.60 $\pm$ 0.28 | 39.1 $\pm$ 3.8    | 3.0 $\pm$ 0.3         |
|          | $\alpha$ : $\gamma$           | SW                | 10 | 1.78 $\pm$ 1.3                 | 90.7 $\pm$ 29        | 0.03 $\pm$ 0.01 | 49.1 $\pm$ 1.6    | 5.1 $\pm$ 0.1         |
|          | CRD- $\alpha$ : CRD- $\gamma$ | SW                | 8  | 1.03 $\pm$ 1.0                 | 77.8 $\pm$ 40        | 0.02 $\pm$ 0.01 | 49.0 $\pm$ 1.5    | 5.8 $\pm$ 0.6         |
|          | N- $\alpha$ : $\gamma$ -C     | SW                | 6  | 2.95 $\pm$ 2.1                 | 117 $\pm$ 21         | 0.04 $\pm$ 0.02 | 52.2 $\pm$ 4.7    | 5.7 $\pm$ 0.2         |
|          | N- $\gamma$ : $\alpha$ -C     | SW                | 7  | 0.50 $\pm$ 0.3                 | 63.3 $\pm$ 19        | 0.02 $\pm$ 0.01 | 62.7 $\pm$ 6.6    | 5.1 $\pm$ 0.3         |
| 2.5X2.5X | $\alpha$ : $\gamma$           | SW                | 12 | 31.8 $\pm$ 12                  | 133 $\pm$ 8.6        | 0.27 $\pm$ 0.10 | 34.5 $\pm$ 1.1    | 4.9 $\pm$ 0.2         |
|          | N- $\alpha$ : $\gamma$ -C     | SW                | 10 | 25.3 $\pm$ 6.9                 | 239 $\pm$ 16         | 0.13 $\pm$ 0.03 | 30.5 $\pm$ 1.0    | 7.0 $\pm$ 0.5         |

|          | N- $\gamma$ : $\alpha$ -C | SW                | 9  | 42.0 $\pm$ 16  | 189 $\pm$ 25   | 0.26 $\pm$ 0.10 | 32.0 $\pm$ 1.4 | 6.7 $\pm$ 0.4 |
|----------|---------------------------|-------------------|----|----------------|----------------|-----------------|----------------|---------------|
| 25% w/v  |                           |                   |    |                |                |                 |                |               |
| 1X1X     | $\alpha$ : $\gamma$       | dH <sub>2</sub> O | 10 | 0.74 $\pm$ 0.3 | 50.6 $\pm$ 7.7 | 0.02 $\pm$ 0.01 | 81.8 $\pm$ 1.7 | 2.6 $\pm$ 0.1 |
|          | $\alpha$ : $\gamma$       | SW                | 9  | 0.65 $\pm$ 0.5 | 64.4 $\pm$ 22  | 0.02 $\pm$ 0.01 | 71.6 $\pm$ 7.1 | 4.5 $\pm$ 0.3 |
| 1.5X1.5X | $\alpha$ : $\gamma$       | dH <sub>2</sub> O | 10 | 3.52 $\pm$ 2.3 | 56.8 $\pm$ 9.3 | 0.07 $\pm$ 0.04 | 64.8 $\pm$ 1.0 | 2.6 $\pm$ 0.1 |
|          | $\alpha$ : $\gamma$       | SW                | 9  | 0.59 $\pm$ 0.4 | 65.2 $\pm$ 21  | 0.02 $\pm$ 0.00 | 77.3 $\pm$ 8.4 | 4.4 $\pm$ 0.4 |
| 2X2X     | $\alpha$ : $\gamma$       | dH <sub>2</sub> O | 10 | 37.4 $\pm$ 17  | 156 $\pm$ 24   | 0.29 $\pm$ 0.12 | 30.6 $\pm$ 1.7 | 4.5 $\pm$ 0.5 |
|          | $\alpha$ : $\gamma$       | SW                | 8  | 3.34 $\pm$ 3.1 | 99.4 $\pm$ 26  | 0.04 $\pm$ 0.03 | 51.6 $\pm$ 7.1 | 5.0 $\pm$ 0.3 |
|          | $\alpha$ : $\gamma$       | dH <sub>2</sub> O | 11 | 29.8 $\pm$ 12  | 87.4 $\pm$ 16  | 0.40 $\pm$ 0.13 | 38.4 $\pm$ 2.3 | 2.4 $\pm$ 0.5 |
| 2.5X2.5X | $\alpha$ : $\gamma$       | SW                | 10 | 15.1 $\pm$ 14  | 125 $\pm$ 13   | 0.13 $\pm$ 0.10 | 45.3 $\pm$ 4.6 | 5.1 $\pm$ 0.2 |

The final table (Table S5) looks at the mechanical properties of rHIF<sub>(C387S)</sub> constructs. N- $\gamma$ -C indicates the full-length construct (of rHIF<sub>(C387S)</sub>) that includes both termini.

**Table S5.** Mechanical properties from various concentrations of the rHIF<sub>(C387S)</sub> constructs spun at multiple stretch factors. Here, dH<sub>2</sub>O is deionized water, and SW is salt water from Instant Ocean.

|          | Construct      | Water Type        | n  | Toughness (MJ/m <sup>3</sup> ) | Tensile Stress (MPa) | Strain (mm/mm)  | Diameter (micron) | Elastic Modulus (GPa) |
|----------|----------------|-------------------|----|--------------------------------|----------------------|-----------------|-------------------|-----------------------|
| 15% w/v  |                |                   |    |                                |                      |                 |                   |                       |
| 1X1X     | N- $\gamma$ -C | dH <sub>2</sub> O | 10 | 1.11 $\pm$ 0.84                | 52.9 $\pm$ 11        | 0.03 $\pm$ 0.01 | 54.7 $\pm$ 0.5    | 2.8 $\pm$ 0.2         |
|          | $\gamma$ -C    | dH <sub>2</sub> O | 10 | 10.5 $\pm$ 8.8                 | 79.6 $\pm$ 24        | 0.14 $\pm$ 0.09 | 51.0 $\pm$ 10     | 2.8 $\pm$ 0.8         |
|          | N- $\gamma$ -C | SW                | 10 | 0.40 $\pm$ 0.3                 | 49.7 $\pm$ 19        | 0.01 $\pm$ 0.01 | 47.7 $\pm$ 8.8    | 3.8 $\pm$ 0.4         |
|          | $\gamma$ -C    | SW                | 9  | 0.04 $\pm$ 0.0                 | 10.9 $\pm$ 5.3       | 0.01 $\pm$ 0.00 | 68.6 $\pm$ 5.8    | 1.7 $\pm$ 0.8         |
| 1.5X1.5X | N- $\gamma$ -C | dH <sub>2</sub> O | 10 | 34.3 $\pm$ 12                  | 70 $\pm$ 2.6         | 0.54 $\pm$ 0.19 | 37.3 $\pm$ 0.4    | 2.9 $\pm$ 0.2         |
|          | N- $\gamma$    | dH <sub>2</sub> O | 11 | 1.23 $\pm$ 0.7                 | 58.9 $\pm$ 15        | 0.03 $\pm$ 0.01 | 42.6 $\pm$ 4.6    | 2.7 $\pm$ 0.6         |
|          | N- $\gamma$ -C | SW                | 10 | 0.40 $\pm$ 0.3                 | 48.1 $\pm$ 21        | 0.01 $\pm$ 0.01 | 46.9 $\pm$ 4.3    | 3.8 $\pm$ 0.3         |
|          | N- $\gamma$    | SW                | 7  | 1.09 $\pm$ 0.4                 | 73.4 $\pm$ 11        | 0.03 $\pm$ 0.01 | 38.7 $\pm$ 2.0    | 3.3 $\pm$ 0.9         |
|          | $\gamma$ -C    | SW                | 10 | 0.16 $\pm$ 0.1                 | 24.5 $\pm$ 11        | 0.01 $\pm$ 0.00 | 53.7 $\pm$ 3.0    | 2.5 $\pm$ 0.2         |
| 2X2X     | N- $\gamma$ -C | dH <sub>2</sub> O | 7  | 28.8 $\pm$ 15                  | 92.7 $\pm$ 21        | 0.35 $\pm$ 0.15 | 29.4 $\pm$ 2.8    | 3.4 $\pm$ 0.6         |
|          | N- $\gamma$ -C | SW                | 11 | 4.28 $\pm$ 3.1                 | 105 $\pm$ 20         | 0.05 $\pm$ 0.03 | 31.6 $\pm$ 1.3    | 4.4 $\pm$ 0.5         |
|          | N- $\gamma$    | SW                | 9  | 25.0 $\pm$ 8.5                 | 83.4 $\pm$ 4.0       | 0.35 $\pm$ 0.11 | 29.2 $\pm$ 0.5    | 3.4 $\pm$ 0.3         |
|          | $\gamma$ -C    | SW                | 8  | 0.34 $\pm$ 0.3                 | 33.2 $\pm$ 18        | 0.02 $\pm$ 0.01 | 40.9 $\pm$ 3.0    | 2.5 $\pm$ 0.8         |
| 20% w/v  |                |                   |    |                                |                      |                 |                   |                       |
| 1X1X     | N- $\gamma$ -C | dH <sub>2</sub> O | 11 | 1.98 $\pm$ 1.3                 | 46.7 $\pm$ 4.7       | 0.05 $\pm$ 0.03 | 76.9 $\pm$ 2.3    | 2.1 $\pm$ 0.1         |
|          | N- $\gamma$    | dH <sub>2</sub> O | 8  | 17.1 $\pm$ 16                  | 73.1 $\pm$ 18        | 0.27 $\pm$ 0.26 | 38.8 $\pm$ 3.5    | 3.1 $\pm$ 0.6         |
|          | $\gamma$ -C    | dH <sub>2</sub> O | 9  | 0.26 $\pm$ 0.3                 | 28 $\pm$ 10          | 0.02 $\pm$ 0.01 | 54.2 $\pm$ 1.7    | 2.1 $\pm$ 0.2         |
|          | N- $\gamma$ -C | SW                | 10 | 0.41 $\pm$ 0.2                 | 41.8 $\pm$ 12        | 0.01 $\pm$ 0.00 | 62.5 $\pm$ 7.2    | 3.5 $\pm$ 0.3         |
|          | N- $\gamma$    | SW                | 9  | 0.92 $\pm$ 0.6                 | 67.7 $\pm$ 28        | 0.02 $\pm$ 0.01 | 55.5 $\pm$ 3.6    | 3.6 $\pm$ 0.7         |
|          | CRD- $\gamma$  | SW                | 9  | 1.43 $\pm$ 0.9                 | 60.7 $\pm$ 23        | 0.04 $\pm$ 0.01 | 113 $\pm$ 29      | 2.0 $\pm$ 0.7         |
| 1.5X1.5X | N- $\gamma$ -C | dH <sub>2</sub> O | 12 | 50.8 $\pm$ 6.6                 | 70.0 $\pm$ 6.4       | 0.84 $\pm$ 0.09 | 43.5 $\pm$ 2.0    | 2.5 $\pm$ 0.3         |
|          | N- $\gamma$    | dH <sub>2</sub> O | 8  | 63.7 $\pm$ 43                  | 101 $\pm$ 38         | 0.78 $\pm$ 0.27 | 30.4 $\pm$ 5.1    | 3.2 $\pm$ 0.8         |
|          | $\gamma$ -C    | dH <sub>2</sub> O | 5  | 0.39 $\pm$ 0.4                 | 33.6 $\pm$ 15        | 0.02 $\pm$ 0.01 | 42.5 $\pm$ 5.8    | 2.1 $\pm$ 0.3         |
|          | N- $\gamma$ -C | SW                | 8  | 0.47 $\pm$ 0.2                 | 50.9 $\pm$ 10        | 0.02 $\pm$ 0.00 | 46.7 $\pm$ 3.3    | 3.7 $\pm$ 0.3         |
|          | N- $\gamma$    | SW                | 6  | 0.87 $\pm$ 0.4                 | 75.1 $\pm$ 22        | 0.02 $\pm$ 0.01 | 47.4 $\pm$ 3.0    | 3.7 $\pm$ 0.6         |
|          | CRD- $\gamma$  | SW                | 10 | 1.20 $\pm$ 0.9                 | 74.2 $\pm$ 31        | 0.03 $\pm$ 0.01 | 59.0 $\pm$ 5.8    | 3.3 $\pm$ 0.5         |
|          | $\gamma$ -C    | SW                | 10 | 0.54 $\pm$ 0.3                 | 48.6 $\pm$ 11        | 0.02 $\pm$ 0.01 | 59.2 $\pm$ 8.6    | 2.6 $\pm$ 0.3         |
| 2X2X     | N- $\gamma$ -C | dH <sub>2</sub> O | 11 | 38.5 $\pm$ 9.9                 | 95.9 $\pm$ 20        | 0.46 $\pm$ 0.03 | 36.5 $\pm$ 3.6    | 3.2 $\pm$ 0.7         |
|          | N- $\gamma$    | dH <sub>2</sub> O | 10 | 59.2 $\pm$ 23                  | 92.8 $\pm$ 29        | 0.75 $\pm$ 0.14 | 28.2 $\pm$ 3.2    | 3.0 $\pm$ 0.8         |
|          | $\gamma$ -C    | dH <sub>2</sub> O | 8  | 0.35 $\pm$ 0.3                 | 33.4 $\pm$ 14        | 0.02 $\pm$ 0.01 | 37.4 $\pm$ 1.3    | 2.1 $\pm$ 0.4         |
| 2.5X2.5X | N- $\gamma$ -C | SW                | 10 | 9.87 $\pm$ 7.5                 | 87.2 $\pm$ 10        | 0.13 $\pm$ 0.09 | 35.6 $\pm$ 2.9    | 4.1 $\pm$ 0.3         |
|          | N- $\gamma$    | SW                | 10 | 15.6 $\pm$ 8.7                 | 178 $\pm$ 32         | 0.11 $\pm$ 0.07 | 27.4 $\pm$ 2.9    | 4.9 $\pm$ 1.2         |
|          | $\gamma$ -C    | SW                | 11 | 4.76 $\pm$ 3.0                 | 78.8 $\pm$ 8.8       | 0.08 $\pm$ 0.04 | 33.1 $\pm$ 1.5    | 3.4 $\pm$ 0.2         |

| 25% w/v  |       |                   |    |             |            |             |            |           |
|----------|-------|-------------------|----|-------------|------------|-------------|------------|-----------|
| 1X1X     | N-γ-C | dH <sub>2</sub> O | 7  | 4.32 ± 4.1  | 56.5 ± 5.2 | 0.09 ± 0.07 | 60.7 ± 8.9 | 2.1 ± 0.2 |
|          | N-γ   | dH <sub>2</sub> O | 5  | 0.61 ± 0.6  | 32.7 ± 35  | 0.05 ± 0.06 | 70.2 ± 26  | 2.0 ± 1.7 |
|          | γ-C   | dH <sub>2</sub> O | 9  | 0.06 ± 0.0  | 10.7 ± 4.5 | 0.02 ± 0.00 | 61.4 ± 7.5 | 1.0 ± 0.2 |
|          | N-γ-C | SW                | 11 | 0.99 ± 0.4  | 71.8 ± 13  | 0.03 ± 0.01 | 69.4 ± 3.5 | 3.1 ± 0.2 |
|          | N-γ   | SW                | 9  | 0.39 ± 0.4  | 32 ± 16    | 0.02 ± 0.01 | 111 ± 7.3  | 2.2 ± 0.3 |
|          | CRD-γ | SW                | 11 | 0.62 ± 0.5  | 51.9 ± 27  | 0.02 ± 0.01 | 87.8 ± 22  | 3.1 ± 0.9 |
|          | γ-C   | SW                | 14 | 0.38 ± 0.2  | 40.7 ± 7.2 | 0.02 ± 0.00 | 79.0 ± 3.8 | 2.4 ± 0.3 |
| 1.5X1.5X | N-γ-C | dH <sub>2</sub> O | 10 | 21.9 ± 10.5 | 73.3 ± 16  | 0.33 ± 0.14 | 46.0 ± 4.4 | 2.5 ± 0.5 |
|          | γ-C   | dH <sub>2</sub> O | 12 | 0.77 ± 0.3  | 48.4 ± 10  | 0.03 ± 0.01 | 51.0 ± 8.3 | 2.3 ± 0.5 |
|          | N-γ-C | SW                | 10 | 1.13 ± 0.3  | 78.4 ± 8.8 | 0.03 ± 0.00 | 63.3 ± 1.0 | 3.3 ± 0.1 |
|          | N-γ   | SW                | 8  | 2.12 ± 1.0  | 102 ± 23   | 0.04 ± 0.01 | 64.6 ± 9.1 | 3.3 ± 0.6 |
|          | CRD-γ | SW                | 11 | 1.54 ± 0.8  | 79.9 ± 11  | 0.03 ± 0.01 | 63.3 ± 3.7 | 3.9 ± 0.2 |
| 2X2X     | N-γ-C | dH <sub>2</sub> O | 11 | 12.1 ± 5.3  | 94.6 ± 28  | 0.15 ± 0.05 | 37.3 ± 4.4 | 3.2 ± 0.7 |
|          | N-γ-C | SW                | 12 | 22.2 ± 13   | 116 ± 9.7  | 0.21 ± 0.11 | 43.0 ± 1.2 | 4.2 ± 0.2 |
|          | N-γ   | SW                | 6  | 0.66 ± 0.6  | 58.7 ± 28  | 0.02 ± 0.01 | 61.5 ± 2.0 | 3.2 ± 0.9 |
| 2.5X2.5X | N-γ-C | SW                | 11 | 13.6 ± 8.1  | 144 ± 13   | 0.11 ± 0.06 | 39.2 ± 3.0 | 4.8 ± 0.3 |
|          | N-γ   | SW                | 12 | 37.9 ± 27   | 108 ± 6.5  | 0.42 ± 0.29 | 53.3 ± 2.3 | 3.5 ± 0.2 |
